# Supplementary material for: The role of the polycomb repressive complex pathway in T and NK cell lymphoma: biological and prognostic implications
Source: Springer Nature journal article supplement (doi:10.1007/s13277-015-3977-y), 2015-09-04
Supplement: MOESM1 [file 9260204]

|  | Ezh2* |  |  | SUZ12* |  |  | EED |  |  | H3K27me3* | | | BMI1 |  |  |
| --- | --- | --- | --- | --- | --- | --- | --- | --- | --- | --- | --- | --- | --- | --- | --- |
|  | low | medium | high | low | medium | high | low | medium | high | low | medium | high | low | medium | high |
| NKTCL (n=56) | 4 (7.1%) | 12 (21.4%) | 40 (71.4%) | 28 (47.5%) | 17 (28.8%) | 14 (23.7%) | 4 (6.8%) | 4 (6.8%) | 53 (86.9%) | 10 (16.4%) | 11 (18.0%) | 40 (65.6%) | 14 (23.7%) | 28 (47.5%) | 17 (28.8%) |
| PTCL (n=44) | 3 (6.8%) | 18 (40.9%) | 23 (52.3%) | 10 (22.7%) | 20 (45.5%) | 14 (31.8%) | 2 (4.5%) | 5 (11.4%) | 37 (84.1%) | 8 (18.2%) | 24 (54.5%) | 12 (27.3%) | 8 (18.2%) | 17 (38.6%) | 19 (43.2%) |
| AITL (n=16) | 5 (31.3%) | 4 (25.0%) | 7 (43.8%) | 5 (31.3%) | 10 (62.5%) | 1 (6.3%) | 1 (6.3%) | 2 (12.5%) | 13 (81.3%) | 3 (18.8%) | 7 (43.8%) | 6 (37.5%) | 4 (25.0%) | 9 (56.3%) | 3 (18.8%) |
| ALCL (n=32) | 5 (15.6%) | 8 (25.0%) | 19 (59.4%) | 9 (27.3%) | 6 (18.2%) | 18 (54.5%) | 0 (0%) | 3 (9.1%) | 30 (90.9%) | 15 (46.9%) | 11 (34.4%) | 6 (18.8%) | 21 (63.6%) | 11 (33.3%) | 1 (3.0%) |
| TLBL (n=19) | 7 (36.8%) | 8 (42.1%) | 4 (21.1%) | 5 (26.3%) | 3 (15.85%) | 11 (57.9%) | 1 (5.3%) | 1 (5.3%) | 17 (89.5%) | 8 (42.1%) | 4 (21.1%) | 7 (36.8%) | 4 (21.1%) | 3 (15.8%) | 12 (63.2%) |
| Others (n=4) | 2 (66.7%) | 1 (33.3%) | 0 (0%) | 4 (100%) | 0 (0%) | 0 (0%) | 1 (25.0%) | 1 (25.0%) | 2 (50.0%) | 2 (66.7%) | 0  (0%) | 1 (33.3%) | 1 (25.0%) | 1 (25.0%) | 2 (50.0%) |
| Total (n=175) | 26 (15.3%) | 51 (30.0%) | 93 (54.7%) | 60 (34.5%) | 56 (32.2%) | 58 (33.3%) | 9 (5.1%) | 16 (9.1%) | 152 (85.9%) | 46 (26.3%) | 57 (32.6%) | 72 (41.1%) | 52 (29.7%) | 69 (39.4%) | 54 (30.9%) |
| P value |  | <0.001 |  |  | <0.001 |  |  | 0.606 |  |  | <0.001 |  |  | <0.001 |  |
| *Information not available in some cases. Valid percentage is presented in the parenthesis.  NKTCL indicates extranodal natural killer/T-cell lymphoma; PTCL, peripheral T cell lymphoma, not otherwise specified; AITL, angioimmunoblastic T cell lymphoma; ALCL, anaplastic large cell lymphoma; TLBL, T lymphoblastic leukemia/lymphoma | | | | | | | | | | | | | | | |

| **Supplementary table1**. Polycomb complex proteins and H3k27me3 expression in overall NK and T cell lymphoma |
| --- |

**Supplementary figure 1.** The overall survival rate according to subtype of T or NK cell lymphomas using Kaplan-Meier plot (*P* = 0.264).
